# Supplementary material for: Three-Dimensional Biologically Relevant Spectrum (BRS-3D): Shape Similarity Profile Based on PDB Ligands as Molecular Descriptors
Source: PubMed Central journal article supplement (PMC6273508; doi:10.3390/molecules21111554), 2016-11-17
Supplement: molecules-21-01554-s001.pdf [file molecules-21-01554-s001.pdf]

# Supplementary Materials: Three-Dimensional Biologically Relevant Spectrum (BRS-3D): Shape Similarity Profile Based on PDB Ligands as Molecular Descriptor

Ben Hu, Zheng-Kun Kuang, Shi-Yu Feng, Dong Wang, Song-Bing He and De-Xin Kong

**Table S1.** SVM models of AChE inhibitors based on different sizes of BRCD-3D.

| Size of BRCD-3D | CV AUC | Prediction Results of Test Sets |           |        |       |
|-----------------|--------|---------------------------------|-----------|--------|-------|
|                 |        | Accuracy                        | Precision | Recall | MCC   |
| BRCD_500        | 0.972  | 0.939                           | 0.938     | 0.895  | 0.869 |
| BRCD_300        | 0.970  | 0.943                           | 0.951     | 0.895  | 0.879 |
| BRCD_200        | 0.967  | 0.943                           | 0.955     | 0.891  | 0.879 |
| BRCD_100        | 0.959  | 0.932                           | 0.945     | 0.870  | 0.855 |
| BRCD_50         | 0.947  | 0.925                           | 0.913     | 0.882  | 0.838 |

The training set consists of 951 AChE inhibitors and 1600 ACD compounds. The test set consists of 238 AChE inhibitors and 399 ACD compounds.

**Table S2.** SVM models of HIV-1 protease inhibitors based on different size of BRCD-3D.

| Size of BRCD-3D | CV AUC | Prediction Results of Test Sets |           |        |       |
|-----------------|--------|---------------------------------|-----------|--------|-------|
|                 |        | Accuracy                        | Precision | Recall | MCC   |
| BRCD_500        | 0.989  | 0.962                           | 0.969     | 0.917  | 0.914 |
| BRCD_300        | 0.988  | 0.964                           | 0.984     | 0.907  | 0.919 |
| BRCD_200        | 0.988  | 0.960                           | 0.955     | 0.926  | 0.911 |
| BRCD_100        | 0.984  | 0.959                           | 0.959     | 0.917  | 0.907 |
| BRCD_50         | 0.980  | 0.947                           | 0.943     | 0.897  | 0.881 |

The training set consists of 820 HIV-1 protease inhibitors and 1600 ACD compounds. The test set consists of 204 HIV-1 protease inhibitors and 399 ACD compounds.

**Table S3.** Enzyme classification of the targets of BRCD-3D ligands.

| Enzyme Classification | Count |
|-----------------------|-------|
| Oxidoreductases       | 15    |
| Transferases          | 103   |
| Hydrolases            | 122   |
| Lyases                | 4     |
| Isomerases            | 7     |
| Ligases               | 4     |
| Non-enzyme            | 45    |
| Sum                   | 300   |

**Table S4.** SCOP classification of the targets of BRCD-3D ligands.

| SCOP Classification                    | Count            |
|----------------------------------------|------------------|
| All alpha proteins                     | 23               |
| All beta proteins                      | 63               |
| Alpha and beta proteins (a + b)        | 63               |
| Alpha and beta proteins (a/b)          | 46               |
| Small proteins                         | 16               |
| Multi-domain proteins (alpha and beta) | 2                |
| Sum                                    | 213 <sup>a</sup> |

<sup>a</sup> Some targets were without SCOP annotations.

**Table S5.** The targets types of BRCD-3D ligands.

| <b>Class</b>                       | <b>Sub-Class</b>                     | <b>Count</b> |
|------------------------------------|--------------------------------------|--------------|
| Enzyme                             | Oxidoreductases                      | 15           |
|                                    | Kinase                               | 80           |
|                                    | Other transferases                   | 23           |
|                                    | Protease                             | 90           |
|                                    | Other hydrolases                     | 32           |
|                                    | Lyases                               | 4            |
|                                    | Isomerases                           | 7            |
|                                    | Ligases                              | 4            |
| <b>Total Number of Enzyme</b>      |                                      | <b>255</b>   |
| Receptor                           | Nuclear receptor                     | 13           |
|                                    | Ligand-gated ion channel             | 1            |
| <b>Total Number of Receptor</b>    |                                      | <b>14</b>    |
| Other class                        | Transport protein                    | 10           |
|                                    | Cytokine                             | 3            |
|                                    | Contractile protein                  | 2            |
|                                    | Cell adhesion related protein        | 2            |
|                                    | Cell cycle related protein           | 1            |
|                                    | Peptide binding protein              | 1            |
|                                    | Lipid binding protein                | 1            |
|                                    | Calcium-binding protein              | 1            |
|                                    | DNA binding protein                  | 1            |
|                                    | RNA binding protein                  | 1            |
|                                    | Growth factor receptor-bound protein | 1            |
|                                    | Inhibitor of apoptosis               | 1            |
|                                    | Translation protein                  | 1            |
|                                    | Lectin                               | 1            |
|                                    | Motor protein                        | 1            |
|                                    | Membrane protein                     | 1            |
|                                    | Chaperone                            | 1            |
| Unknown function                   | 1                                    |              |
| <b>Total Number of Other Class</b> |                                      | <b>31</b>    |

**Table S6.** Comparison of the three methods handling data imbalance for the 42 GLL/GDD data sets. The CV AUC is 10-fold cross-validation result of the training set. Accuracy, Precision, Recall and MCC are the results of the test set.

| Data Sets | CV AUC   |       |       | Accuracy |       |       | Precision |       |       | Recall   |       |       | MCC      |       |       |
|-----------|----------|-------|-------|----------|-------|-------|-----------|-------|-------|----------|-------|-------|----------|-------|-------|
|           | Weighted | 1:39  | 1:10  | Weighted | 1:39  | 1:10  | Weighted  | 1:39  | 1:10  | Weighted | 1:39  | 1:10  | Weighted | 1:39  | 1:10  |
| 1         | 0.989    | 0.988 | 0.988 | 0.994    | 0.994 | 0.981 | 0.986     | 0.993 | 0.963 | 0.763    | 0.768 | 0.826 | 0.865    | 0.870 | 0.882 |
| 2         | 0.975    | 0.975 | 0.974 | 0.992    | 0.994 | 0.974 | 0.888     | 0.931 | 0.883 | 0.782    | 0.802 | 0.822 | 0.829    | 0.861 | 0.838 |
| 3         | 0.988    | 0.988 | 0.986 | 0.993    | 0.992 | 0.982 | 1.000     | 1.000 | 0.959 | 0.703    | 0.685 | 0.838 | 0.835    | 0.824 | 0.887 |
| 4         | 0.980    | 0.979 | 0.976 | 0.995    | 0.996 | 0.988 | 0.981     | 1.000 | 0.982 | 0.825    | 0.825 | 0.889 | 0.898    | 0.906 | 0.928 |
| 5         | 0.981    | 0.981 | 0.978 | 0.992    | 0.992 | 0.974 | 0.894     | 0.981 | 0.956 | 0.759    | 0.703 | 0.745 | 0.820    | 0.827 | 0.830 |
| 6         | 0.983    | 0.983 | 0.978 | 0.986    | 0.987 | 0.970 | 0.721     | 0.778 | 0.889 | 0.738    | 0.667 | 0.762 | 0.722    | 0.713 | 0.807 |
| 7         | 0.957    | 0.956 | 0.960 | 0.991    | 0.991 | 0.964 | 1.000     | 1.000 | 0.842 | 0.625    | 0.625 | 0.750 | 0.787    | 0.787 | 0.776 |
| 8         | 0.992    | 0.992 | 0.989 | 0.991    | 0.991 | 0.980 | 1.000     | 1.000 | 1.000 | 0.638    | 0.638 | 0.787 | 0.795    | 0.795 | 0.878 |
| 9         | 0.993    | 0.993 | 0.991 | 0.997    | 0.997 | 0.994 | 1.000     | 1.000 | 0.979 | 0.875    | 0.875 | 0.958 | 0.933    | 0.933 | 0.965 |
| 10        | 0.986    | 0.986 | 0.984 | 0.992    | 0.992 | 0.979 | 0.894     | 0.915 | 0.939 | 0.750    | 0.768 | 0.821 | 0.814    | 0.834 | 0.867 |
| 11        | 0.985    | 0.985 | 0.984 | 0.995    | 0.995 | 0.981 | 0.983     | 0.983 | 0.953 | 0.808    | 0.808 | 0.836 | 0.889    | 0.889 | 0.883 |
| 12        | 0.984    | 0.983 | 0.986 | 0.993    | 0.991 | 0.975 | 0.894     | 0.980 | 0.909 | 0.797    | 0.662 | 0.811 | 0.841    | 0.801 | 0.845 |
| 13        | 0.985    | 0.984 | 0.984 | 0.992    | 0.993 | 0.980 | 0.851     | 0.927 | 0.938 | 0.820    | 0.789 | 0.839 | 0.831    | 0.851 | 0.876 |
| 14        | 0.983    | 0.982 | 0.978 | 0.991    | 0.990 | 0.968 | 0.930     | 0.949 | 1.000 | 0.678    | 0.627 | 0.644 | 0.790    | 0.767 | 0.789 |
| 15        | 0.983    | 0.984 | 0.981 | 0.993    | 0.994 | 0.981 | 0.968     | 0.968 | 0.970 | 0.763    | 0.771 | 0.814 | 0.856    | 0.861 | 0.878 |
| 16        | 0.988    | 0.987 | 0.986 | 0.994    | 0.994 | 0.984 | 0.889     | 0.977 | 0.950 | 0.873    | 0.782 | 0.873 | 0.878    | 0.871 | 0.902 |
| 17        | 0.987    | 0.987 | 0.982 | 0.994    | 0.994 | 0.982 | 0.948     | 0.948 | 0.950 | 0.807    | 0.807 | 0.842 | 0.872    | 0.872 | 0.885 |
| 18        | 0.953    | 0.954 | 0.957 | 0.991    | 0.990 | 0.971 | 0.983     | 0.934 | 0.917 | 0.648    | 0.648 | 0.750 | 0.794    | 0.773 | 0.814 |
| 19        | 0.959    | 0.958 | 0.952 | 0.979    | 0.991 | 0.977 | 0.562     | 0.924 | 0.922 | 0.839    | 0.701 | 0.816 | 0.677    | 0.801 | 0.855 |
| 20        | 0.961    | 0.960 | 0.957 | 0.992    | 0.990 | 0.968 | 0.967     | 0.981 | 0.938 | 0.686    | 0.605 | 0.698 | 0.811    | 0.766 | 0.793 |
| 21        | 0.995    | 0.995 | 0.995 | 0.992    | 0.992 | 0.983 | 0.912     | 0.939 | 0.972 | 0.738    | 0.738 | 0.833 | 0.816    | 0.829 | 0.891 |
| 22        | 0.986    | 0.986 | 0.987 | 0.991    | 0.991 | 0.991 | 0.964     | 0.964 | 0.975 | 0.643    | 0.643 | 0.929 | 0.783    | 0.783 | 0.947 |
| 23        | 0.992    | 0.992 | 0.989 | 0.996    | 0.990 | 0.989 | 0.904     | 0.857 | 0.974 | 0.927    | 0.732 | 0.902 | 0.914    | 0.787 | 0.931 |
| 24        | 0.990    | 0.990 | 0.986 | 0.995    | 0.995 | 0.989 | 0.971     | 0.971 | 0.950 | 0.829    | 0.829 | 0.927 | 0.895    | 0.895 | 0.932 |
| 25        | 0.994    | 0.994 | 0.994 | 0.996    | 0.996 | 0.988 | 0.982     | 0.982 | 0.944 | 0.860    | 0.853 | 0.922 | 0.917    | 0.913 | 0.927 |
| 26        | 0.996    | 0.996 | 0.996 | 0.998    | 0.998 | 0.994 | 0.996     | 0.996 | 0.990 | 0.907    | 0.907 | 0.940 | 0.949    | 0.949 | 0.961 |
| 27        | 0.986    | 0.986 | 0.984 | 0.993    | 0.993 | 0.980 | 1.000     | 1.000 | 0.983 | 0.722    | 0.722 | 0.792 | 0.847    | 0.847 | 0.872 |
| 28        | 0.981    | 0.981 | 0.982 | 0.992    | 0.992 | 0.974 | 0.979     | 0.979 | 0.962 | 0.701    | 0.701 | 0.746 | 0.825    | 0.825 | 0.834 |
| 29        | 0.977    | 0.976 | 0.976 | 0.992    | 0.992 | 0.975 | 0.951     | 0.974 | 0.914 | 0.726    | 0.717 | 0.812 | 0.827    | 0.832 | 0.843 |
| 30        | 0.982    | 0.981 | 0.983 | 0.993    | 0.993 | 0.984 | 0.941     | 0.979 | 0.949 | 0.750    | 0.719 | 0.875 | 0.837    | 0.835 | 0.902 |
| 31        | 0.993    | 0.993 | 0.991 | 0.995    | 0.995 | 0.986 | 0.982     | 0.982 | 0.983 | 0.827    | 0.827 | 0.857 | 0.899    | 0.899 | 0.910 |
| 32        | 0.987    | 0.986 | 0.984 | 0.994    | 0.994 | 0.984 | 0.932     | 0.972 | 0.959 | 0.809    | 0.772 | 0.860 | 0.865    | 0.863 | 0.900 |
| 33        | 0.986    | 0.985 | 0.983 | 0.993    | 0.992 | 0.981 | 0.902     | 1.000 | 0.950 | 0.814    | 0.690 | 0.841 | 0.853    | 0.828 | 0.884 |
| 34        | 0.990    | 0.990 | 0.988 | 0.995    | 0.995 | 0.982 | 0.979     | 0.979 | 0.917 | 0.816    | 0.816 | 0.877 | 0.891    | 0.891 | 0.887 |
| 35        | 0.997    | 0.997 | 0.997 | 0.992    | 0.992 | 0.981 | 0.958     | 0.958 | 0.963 | 0.730    | 0.730 | 0.825 | 0.833    | 0.833 | 0.882 |
| 36        | 0.990    | 0.990 | 0.990 | 0.989    | 0.989 | 0.972 | 1.000     | 1.000 | 0.971 | 0.543    | 0.543 | 0.717 | 0.733    | 0.733 | 0.821 |
| 37        | 0.980    | 0.980 | 0.979 | 0.991    | 0.991 | 0.973 | 0.914     | 0.975 | 0.970 | 0.711    | 0.639 | 0.728 | 0.802    | 0.785 | 0.828 |
| 38        | 0.990    | 0.990 | 0.987 | 0.993    | 0.993 | 0.989 | 1.000     | 1.000 | 1.000 | 0.722    | 0.722 | 0.875 | 0.847    | 0.847 | 0.930 |
| 39        | 0.990    | 0.990 | 0.986 | 0.990    | 0.990 | 0.979 | 1.000     | 1.000 | 0.978 | 0.596    | 0.596 | 0.789 | 0.768    | 0.768 | 0.869 |
| 40        | 0.991    | 0.991 | 0.990 | 0.994    | 0.994 | 0.982 | 0.974     | 0.982 | 0.976 | 0.772    | 0.759 | 0.827 | 0.864    | 0.860 | 0.890 |
| 41        | 0.986    | 0.986 | 0.983 | 0.993    | 0.993 | 0.980 | 0.971     | 0.971 | 0.973 | 0.733    | 0.733 | 0.800 | 0.840    | 0.840 | 0.872 |
| 42        | 0.983    | 0.983 | 0.984 | 0.992    | 0.992 | 0.982 | 0.969     | 0.969 | 1.000 | 0.689    | 0.689 | 0.800 | 0.813    | 0.813 | 0.886 |

**Table S7.** Comparison of the Enrichment Factor (EF) of BRS-3D based models and of docking.

| Data Sets        | BRS-3D <sup>a</sup> |                  | Docking <sup>b</sup> |                 |                  | PDB ID <sup>c</sup> |
|------------------|---------------------|------------------|----------------------|-----------------|------------------|---------------------|
|                  | EF <sub>2</sub>     | EF <sub>10</sub> | EF <sub>max</sub>    | EF <sub>2</sub> | EF <sub>10</sub> |                     |
| AA2AR_Antagonist | 39.6                | 9.3              | 12.9                 | 7.2             | 3.3              | 3EML <sup>d</sup>   |
|                  |                     |                  | 32.8                 | 11.7            | 3.1              | 3EML <sup>e</sup>   |
| ADRB1_Agonist    | 36.2                | 9.5              | 12.7                 | 10.8            | 5.2              | 2Y01                |
|                  |                     |                  | 34.3                 | 14.6            | 5.7              | 2Y02                |
|                  |                     |                  | 20.0                 | 8.9             | 5.9              | 2Y03                |
|                  |                     |                  | 4.8                  | 4.1             | 3.9              | 2Y04                |
| ADRB1_Antagonist | 39.0                | 9.8              | 5.0                  | 3.1             | 2.6              | 2VT4                |
|                  |                     |                  | 3.8                  | 2.9             | 3.0              | 2YCW                |
|                  |                     |                  | 6.5                  | 5.2             | 3.1              | 2YCZ                |
| ADRB2_Agonist    | 38.9                | 10.0             | 38.2                 | 21.0            | 7.9              | 3POG                |
|                  |                     |                  | 7.4                  | 5.9             | 3.5              | 2RH1                |
| ADRB2_Antagonist | 38.6                | 10.0             | 13.3                 | 7.1             | 3.9              | 3NY8                |
|                  |                     |                  | 17.1                 | 5.4             | 3.6              | 3NY9                |
|                  |                     |                  | 26.7                 | 6.9             | 3.5              | 3NYA                |
| DRD3_Antagonist  | 37.3                | 9.7              | 1.7                  | 0.3             | 1.5              | 3PBL                |

<sup>a</sup> The EFs were computed based on the test set of each data sets; <sup>b</sup> The EFs were computed based on each whole data sets. Data of docking results were originally reported in reference: [1]; <sup>c</sup> The PDB ID of targets which were used in docking process; <sup>d</sup> Excluding crystallographic waters; <sup>e</sup> Including eight crystallographic waters.

**Table S8.** The prediction performance of model used for HDAC1 inhibitor screening.

| Train/Test <sup>a</sup> | CV AUC | Testing Results |           |        |       |
|-------------------------|--------|-----------------|-----------|--------|-------|
|                         |        | Accuracy        | Precision | Recall | MCC   |
| 6536/4301               | 0.989  | 0.975           | 0.716     | 0.683  | 0.686 |

<sup>a</sup> 1737 non-repetitive inhibitors of human HDAC1 (ChEMBL Target ID: ChEMBL325) with definite IC<sub>50</sub> values were extracted from the ChEMBL compound database (version 17) and used as the positive samples in the SVM model. And 10,000 compounds with similar physicochemical properties to the active compounds were extracted from MDL Drug Data Report (MDDR) and used as the negative sample. From above samples, 1516 HDAC1 inhibitors and 5020 MDDR compounds were selected randomly and used as the training set to build the SVM discriminant model. The remaining compounds were used as the test set to verify the predictive power of model.

**Table S9.** The subtype selectivity regression models for cannabinoid receptor ligands.

| Train/Test | Feature    | Q <sup>2</sup> | RMSE_CV | R <sup>2</sup> | RMSE  |
|------------|------------|----------------|---------|----------------|-------|
| 1204/301   | 3 (1%)     | 0.199          | 1.313   | 0.213          | 1.440 |
|            | 15 (5%)    | 0.542          | 0.991   | 0.653          | 0.957 |
|            | 30 (10%)   | 0.614          | 0.916   | 0.705          | 0.881 |
|            | 60 (20%)   | 0.650          | 0.867   | 0.753          | 0.807 |
|            | 120 (40%)  | 0.675          | 0.838   | 0.750          | 0.811 |
|            | 180 (60%)  | 0.684          | 0.823   | 0.766          | 0.785 |
|            | 240 (80%)  | 0.689          | 0.820   | 0.770          | 0.779 |
|            | 300 (100%) | 0.686          | 0.829   | 0.768          | 0.782 |

**Table S10.** The subtype selectivity discriminant models for cannabinoid receptor ligands.

| Train/Test | Feature    | CV AUC | Sensitivity | Specificity | Precision | Accuracy | MCC   |
|------------|------------|--------|-------------|-------------|-----------|----------|-------|
| 542/135    | 3 (1%)     | 0.930  | 0.763       | 0.949       | 0.853     | 0.896    | 0.737 |
|            | 15 (5%)    | 0.982  | 0.895       | 0.990       | 0.971     | 0.963    | 0.908 |
|            | 30 (10%)   | 0.985  | 0.921       | 1.000       | 1.000     | 0.978    | 0.945 |
|            | 60 (20%)   | 0.989  | 0.868       | 1.000       | 1.000     | 0.963    | 0.909 |
|            | 120 (40%)  | 0.990  | 0.921       | 0.990       | 0.972     | 0.970    | 0.926 |
|            | 180 (60%)  | 0.992  | 0.895       | 1.000       | 1.000     | 0.970    | 0.927 |
|            | 240 (80%)  | 0.991  | 0.921       | 0.979       | 0.946     | 0.963    | 0.908 |
|            | 300 (100%) | 0.991  | 0.947       | 0.990       | 0.973     | 0.978    | 0.945 |

**Table S11.** SVM models based on different profiles.

| Methods                       | CV AUC | Prediction Results |                 |                 |       |
|-------------------------------|--------|--------------------|-----------------|-----------------|-------|
|                               |        | Accuracy           | Precision       | Recall          | MCC   |
| Dock <sup>a</sup>             | 0.941  | 0.882 (563/638)    | 0.879 (189/215) | 0.794 (189/238) | 0.746 |
| Dock + Sim_align <sup>b</sup> | 0.971  | 0.922 (587/637)    | 0.920 (206/224) | 0.866 (206/238) | 0.831 |
| Dock + Sim_score <sup>c</sup> | 0.943  | 0.901 (573/636)    | 0.872 (205/235) | 0.861 (205/238) | 0.788 |
| Sim_align <sup>d</sup>        | 0.971  | 0.928 (591/637)    | 0.903 (215/238) | 0.903 (215/238) | 0.846 |

<sup>a</sup> The objective compounds were docked into the binding sites using Surflex-Dock. The docking score array was used as independent variables; <sup>b</sup> The objective compounds were docked into the binding sites using Surflex-Dock. Then, the docked conformation for each target was superimposed rigidly to BRCD-3D ligands using Surflex-Sim. The superimposing score array was used as independent variables; <sup>c</sup> The objective compounds were docked into the binding sites using Surflex-Dock. Then, the similarity scores between the docked conformation and BRCD-3D ligands were calculated with Surflex-Sim without optimization. The similarity score array was used as independent variables; <sup>d</sup> The BRS-3D was calculated using Surflex-Sim as described in MATERIALS AND METHODS section.

**Table S12.** List of 2D topological descriptors calculated by Dragon.

| <b>Descriptor</b> | <b>Meaning</b>                                | <b>Descriptor</b> | <b>Meaning</b>                             |
|-------------------|-----------------------------------------------|-------------------|--------------------------------------------|
| ZM1               | first Zagreb index M1                         | S3K               | 3-path Kier alpha-modified shape index     |
| ZM1V              | first Zagreb index by valence vertex degrees  | PHI               | Kier flexibility index                     |
| ZM2               | second Zagreb index M2                        | BLI               | Kier benzene-likeness index                |
| ZM2V              | second Zagreb index by valence vertex degrees | PW2               | path/walk 2 - Randic shape index           |
| Qindex            | Quadratic index                               | PW3               | path/walk 3 - Randic shape index           |
| SNar              | Narumi simple topological index (log)         | PW4               | path/walk 4 - Randic shape index           |
| HNar              | Narumi harmonic topological index             | PW5               | path/walk 5 - Randic shape index           |
| GNar              | Narumi geometric topological index            | PJI2              | 2D Petitjean shape index                   |
| Xt                | Total structure connectivity index            | CSI               | eccentric connectivity index               |
| Dz                | Pogliani index                                | ECC               | eccentricity                               |
| Ram               | ramification index                            | AECC              | average eccentricity                       |
| Pol               | polarity number                               | DECC              | eccentric                                  |
| LPRS              | log of product of row sums (PRS)              | MDDD              | mean distance degree deviation             |
| VDA               | average vertex distance degree                | UNIP              | unipolarity                                |
| MSD               | mean square distance index (Balaban)          | CENT              | centralization                             |
| SMTI              | Schultz Molecular Topological Index (MTI)     | VAR               | variation                                  |
| SMTIV             | Schultz MTI by valence vertex degrees         | BAC               | Balaban centric index                      |
| GMTI              | Gutman Molecular Topological Index            | Lop               | Lopping centric index                      |
| GMTIV             | Gutman MTI by valence vertex degrees          | ICR               | radial centric information index           |
| Xu                | Xu index                                      | D/Dr03            | distance/detour ring index of order 3      |
| SPI               | superpendentic index                          | D/Dr04            | distance/detour ring index of order 4      |
| W                 | Wiener W index                                | D/Dr05            | distance/detour ring index of order 5      |
| WA                | mean Wiener index                             | D/Dr06            | distance/detour ring index of order 6      |
| Har               | Harary H index                                | D/Dr07            | distance/detour ring index of order 7      |
| Har2              | square reciprocal distance sum index          | D/Dr08            | distance/detour ring index of order 8      |
| QW                | quasi-Wiener index (Kirchhoff number)         | D/Dr09            | distance/detour ring index of order 9      |
| TI1               | first Mohar index TI1                         | D/Dr10            | distance/detour ring index of order 10     |
| TI2               | second Mohar index TI2                        | D/Dr11            | distance/detour ring index of order 11     |
| STN               | spanning tree number (log)                    | D/Dr12            | distance/detour ring index of order 12     |
| HyDp              | hyper-distance-path index                     | T(N..N)           | sum of topological distances between N..N  |
| RHyDp             | reciprocal hyper-distance-path index          | T(N..O)           | sum of topological distances between N..O  |
| w                 | detour index                                  | T(N..S)           | sum of topological distances between N..S  |
| ww                | hyper-detour index                            | T(N..P)           | sum of topological distances between N..P  |
| Rww               | reciprocal hyper-detour index                 | T(N..F)           | sum of topological distances between N..F  |
| D/D               | distance/detour index                         | T(N..Cl)          | sum of topological distances between N..Cl |

|       |                                                                    |           |                                             |
|-------|--------------------------------------------------------------------|-----------|---------------------------------------------|
| Wap   | all-path Wiener index                                              | T(N..Br)  | sum of topological distances between N..Br  |
| WhetZ | Wiener-type index from Z weighted distance matrix (Barysz matrix)  | T(O..O)   | sum of topological distances between O..O   |
| Whetm | Wiener-type index from mass weighted distance matrix               | T(O..S)   | sum of topological distances between O..S   |
| Whetv | Wiener-type index from van der Waals weighted distance matrix      | T(O..P)   | sum of topological distances between O..P   |
| Whete | Wiener-type index from electronegativity weighted distance matrix  | T(O..F)   | sum of topological distances between O..F   |
| Whetp | Wiener-type index from polarizability weighted distance matrix     | T(O..Cl)  | sum of topological distances between O..Cl  |
| J     | Balaban distance connectivity index                                | T(O..Br)  | sum of topological distances between O..Br  |
| JhetZ | Balaban-type index from Z weighted distance matrix (Barysz matrix) | T(S..S)   | sum of topological distances between S..S   |
| Jhetm | Balaban-type index from mass weighted distance matrix              | T(S..F)   | sum of topological distances between S..F   |
| Jhetv | Balaban-type index from van der Waals weighted distance matrix     | T(S..Cl)  | sum of topological distances between S..Cl  |
| Jhete | Balaban-type index from electronegativity weighted distance matrix | T(S..Br)  | sum of topological distances between S..Br  |
| Jhetp | Balaban-type index from polarizability weighted distance matrix    | T(P..Cl)  | sum of topological distances between P..Cl  |
| MAXDN | maximal electrotopological negative variation                      | T(F..F)   | sum of topological distances between F..F   |
| MAXDP | maximal electrotopological positive variation                      | T(F..Cl)  | sum of topological distances between F..Cl  |
| DELS  | molecular electrotopological variation                             | T(F..Br)  | sum of topological distances between F..Br  |
| TIE   | E-state topological parameter                                      | T(Cl..Cl) | sum of topological distances between Cl..Cl |
| S0K   | Kier symmetry index                                                | T(Cl..Br) | sum of topological distances between Cl..Br |
| S1K   | 1-path Kier alpha-modified shape index                             | T(Br..Br) | sum of topological distances between Br..Br |
| S2K   | 2-path Kier alpha-modified shape index                             |           |                                             |

---

**Table S13.** List of 3D descriptors calculated by MOE.

| Descriptor   | Meaning                                                                                                                                                                                                                                                 |
|--------------|---------------------------------------------------------------------------------------------------------------------------------------------------------------------------------------------------------------------------------------------------------|
| ASA          | Water accessible surface area calculated using a radius of 1.4 Å for the water molecule. A polyhedral representation is used for each atom in calculating the surface area.                                                                             |
| dens         | Mass density: molecular weight divided by van der Waals volume as calculated in the vol descriptor.                                                                                                                                                     |
| glob         | Globularity, or inverse condition number (smallest eigenvalue divided by the largest eigenvalue) of the covariance matrix of atomic coordinates. A value of 1 indicates a perfect sphere while a value of 0 indicates a two- or one-dimensional object. |
| pmi          | Principal moment of inertia.                                                                                                                                                                                                                            |
| pmiX         | x component of the principal moment of inertia (external coordinates).                                                                                                                                                                                  |
| pmiY         | y component of the principal moment of inertia (external coordinates).                                                                                                                                                                                  |
| pmiZ         | z component of the principal moment of inertia (external coordinates).                                                                                                                                                                                  |
| pmi1         | First diagonal element of diagonalized moment of inertia tensor.                                                                                                                                                                                        |
| pmi2         | Second diagonal element of diagonalized moment of inertia tensor.                                                                                                                                                                                       |
| pmi3         | Third diagonal element of diagonalized moment of inertia tensor.                                                                                                                                                                                        |
| npr1         | Normalized PMI ratio pmi1/pmi3.                                                                                                                                                                                                                         |
| npr2         | Normalized PMI ratio pmi2/pmi3.                                                                                                                                                                                                                         |
| rgyr         | Radius of gyration.                                                                                                                                                                                                                                     |
| std_dim1     | Standard dimension 1: the square root of the largest eigenvalue of the covariance matrix of the atomic coordinates. A standard dimension is equivalent to the standard deviation along a principal component axis.                                      |
| std_dim2     | Standard dimension 2: the square root of the second largest eigenvalue of the covariance matrix of the atomic coordinates. A standard dimension is equivalent to the standard deviation along a principal component axis.                               |
| std_dim3     | Standard dimension 3: the square root of the third largest eigenvalue of the covariance matrix of the atomic coordinates. A standard dimension is equivalent to the standard deviation along a principal component axis.                                |
| vol          | van der Waals volume calculated using a grid approximation (spacing 0.75 Å).                                                                                                                                                                            |
| VSA          | van der Waals surface area. A polyhedral representation is used for each atom in calculating the surface area.                                                                                                                                          |
| vsurf_V      | Interaction field volume                                                                                                                                                                                                                                |
| vsurf_S      | Interaction field surface area                                                                                                                                                                                                                          |
| vsurf_R      | Surface rugosity                                                                                                                                                                                                                                        |
| vsurf_G      | Surface globularity                                                                                                                                                                                                                                     |
| vsurf_W*     | Hydrophilic volume (8 descriptors, * can take any value from 1 to 8)                                                                                                                                                                                    |
| vsurf_IW*    | Hydrophilic integrity moment (8 descriptors, * can take any value from 1 to 8)                                                                                                                                                                          |
| vsurf_CW*    | Capacity factor (8 descriptors, * can take any value from 1 to 8)                                                                                                                                                                                       |
| vsurf_Ewmin* | Lowest hydrophilic energy (3 descriptors, * can take any value from 1 to 3)                                                                                                                                                                             |
| vsurf_DW*    | Contact distances of vsurf_EWmin (3 descriptors, * can take any value among 12, 13 and 23)                                                                                                                                                              |
| vsurf_D*     | Hydrophobic volume (8 descriptors, * can take any value from 1 to 8)                                                                                                                                                                                    |
| vsurf_ID*    | Hydrophobic integrity moment (8 descriptors, * can take any value from 1 to 8)                                                                                                                                                                          |
| vsurf_EDmin* | Lowest hydrophobic energy (3 descriptors, * can take any value from 1 to 8)                                                                                                                                                                             |
| vsurf_DD*    | Contact distances of vsurf_DDmin (3 descriptors, * can take any value among 12, 13 and 23)                                                                                                                                                              |
| vsurf_HL*    | Hydrophilic-Lipophilic (2 descriptors, * can take any value from 1 to 2)                                                                                                                                                                                |
| vsurf_A      | Amphiphilic moment                                                                                                                                                                                                                                      |
| vsurf_CP     | Critical packing parameter                                                                                                                                                                                                                              |
| vsurf_Wp*    | Polar volume (8 descriptors, * can take any value from 1 to 8)                                                                                                                                                                                          |
| vsurf_HB*    | H-bond donor capacity (8 descriptors, * can take any value from 1 to 8)                                                                                                                                                                                 |



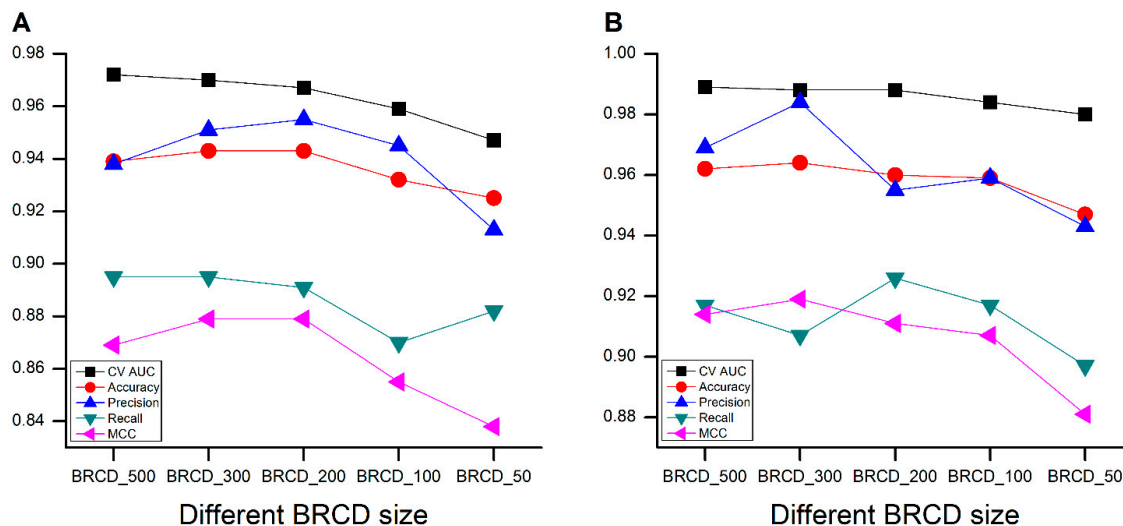

**Figure S1.** The results of the models developed with different size of BRCD-3D. (A) The SVM classification model of AChE inhibitors; (B) The SVM classification model of HIV-1 protease inhibitors.

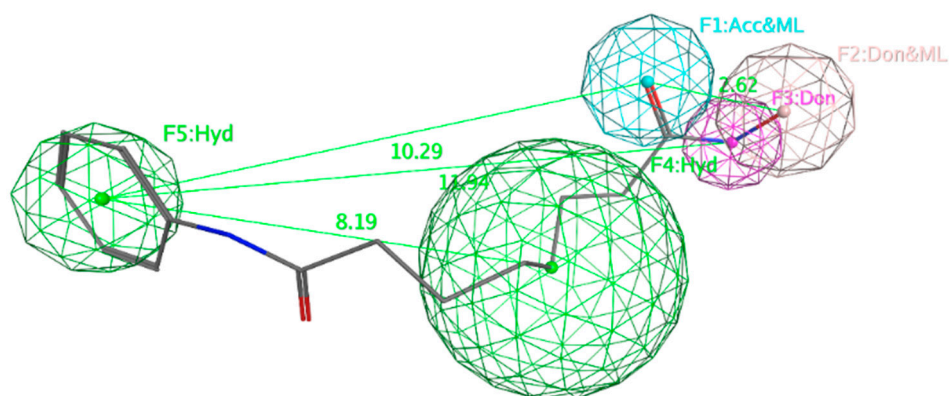

**Figure S2.** The pharmacophore model based on the conformation of SAHA in 1T69. The pharmacophore model was defined with the pharmacophore query editor in MOE 2009. The feature types and radii are as follows. Feature 1 (F1) is hydrogen bond acceptor and metal ligator (Acc&ML) with radius of 1.3 Å. Feature 2 (F2) is hydrogen bond donor and metal ligator (Don&ML) with radius of 1.3 Å. Feature 3 (F3) is hydrogen bond donor (Don) with radius of 1 Å. Feature 4 (F4) and feature 5 (F5) are hydrophobic centroid (Hyd) with radii of 2.5 and 1.4 Å, respectively. The green numbers represent the distance between two feature centers, and the unit is Å.

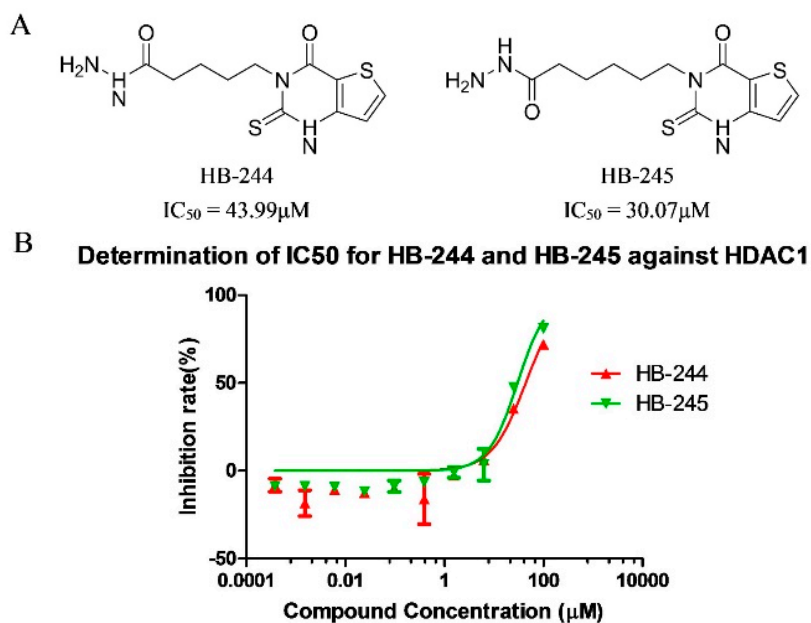

**Figure S3.** The structures (A) of the two active compounds identified with BRS-3D integrated screening protocol and their inhibition curve (B) against HDAC1. HDAC1 inhibition assay was tested by the company Medicilon (<http://www.medicilon.com/>). The enzymatic activity was assessed using a fluorogenic HDAC1 assay kit purchased from BPS Bioscience (San Diego, CA, USA). Briefly, the HDAC1 enzyme was incubated with vehicle or various concentrations of test compounds at 37 °C for 45 min in the presence of an HDAC1 fluorometric substrate. After the HDAC1 assay developer (which produced a fluorophore in the reaction mixture) was added, the fluorescence was measured using a SpectraMax M5 (Molecular Devices) plate reader with excitation at 360 nm and emission at 460 nm. The measured activities were calculated using GraphPad Prism (GraphPad software, San Diego, CA, USA). HDAC assay buffer (Cat: 50031), developer (Cat: 50030), substrate (Cat: 50037), and HDAC 1 (Cat: 50051) were all included in the HDAC1 assay kit. Black opaque 96-well microplates (Cat: 6005270) from Perkin Elmer were used with the SpectraMax M5 plate reader from Molecular Devices.

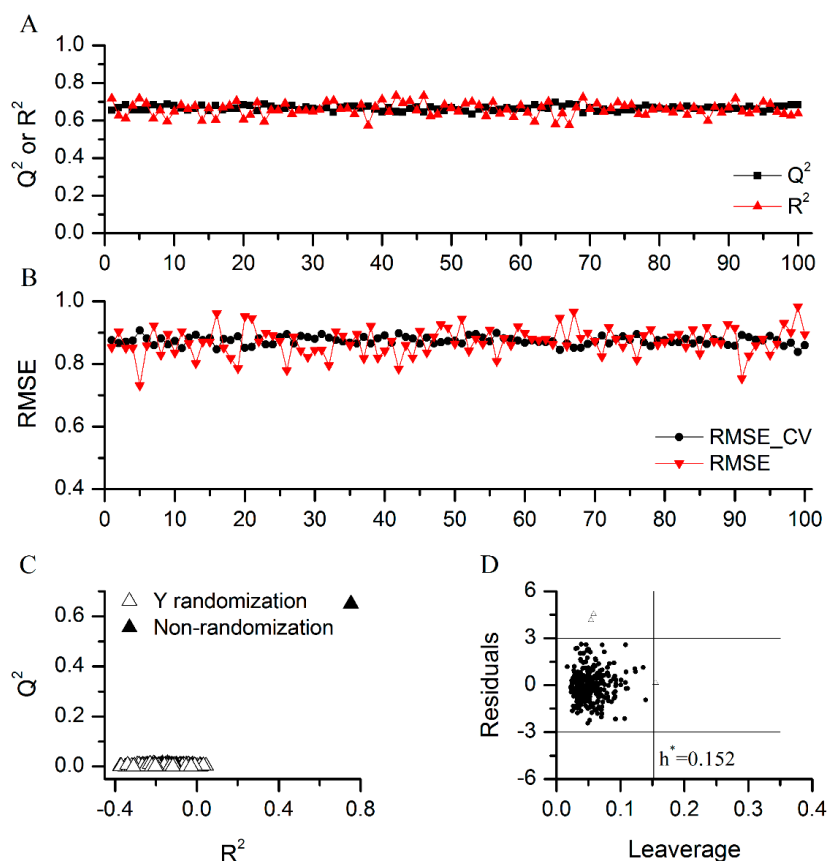

**Figure S4.** (A,B) The results of 100 resampling processes; (C) The comparison of Y-randomization models and original model; (D) The Williams plot for the applicability domain (AD) analysis of models. The resampling process, Y-randomization test and AD analysis were applied for the selectivity regression model with 20% features. In the resampling process, the whole samples were randomly divided into training set and test set for 100 times. For each division, model developed using training set was conducted to predict the test set. The training and test were repeated 100 times, and results were illustrated in (A,B). The Y-Randomization test was to randomize the response variables (SR values) of training set and develop model to predict the original test set, which was repeated 500 times. Additionally, the AD was quantified by the leverage value ( $h$ ), which were generated by the Hat Matrix ( $H$ ) calculation:  $H = X(X^T X)^{-1} X^T$ , where  $X$  is the descriptor matrix,  $X^T$  is the transpose of  $X$ , and  $(X^T X)^{-1}$  is the inverse of matrix  $(X^T X)$ . The leverages are the diagonal elements of the  $H$  matrix. A warning leverage ( $h^*$ ) is generally computed by  $h^* = 3p/n$ , where  $p$  is the number of independent variables plus one and  $n$  is the number of compounds in the training set. The triangle points in (D) are outside the AD and the prediction for these points may not reliable.

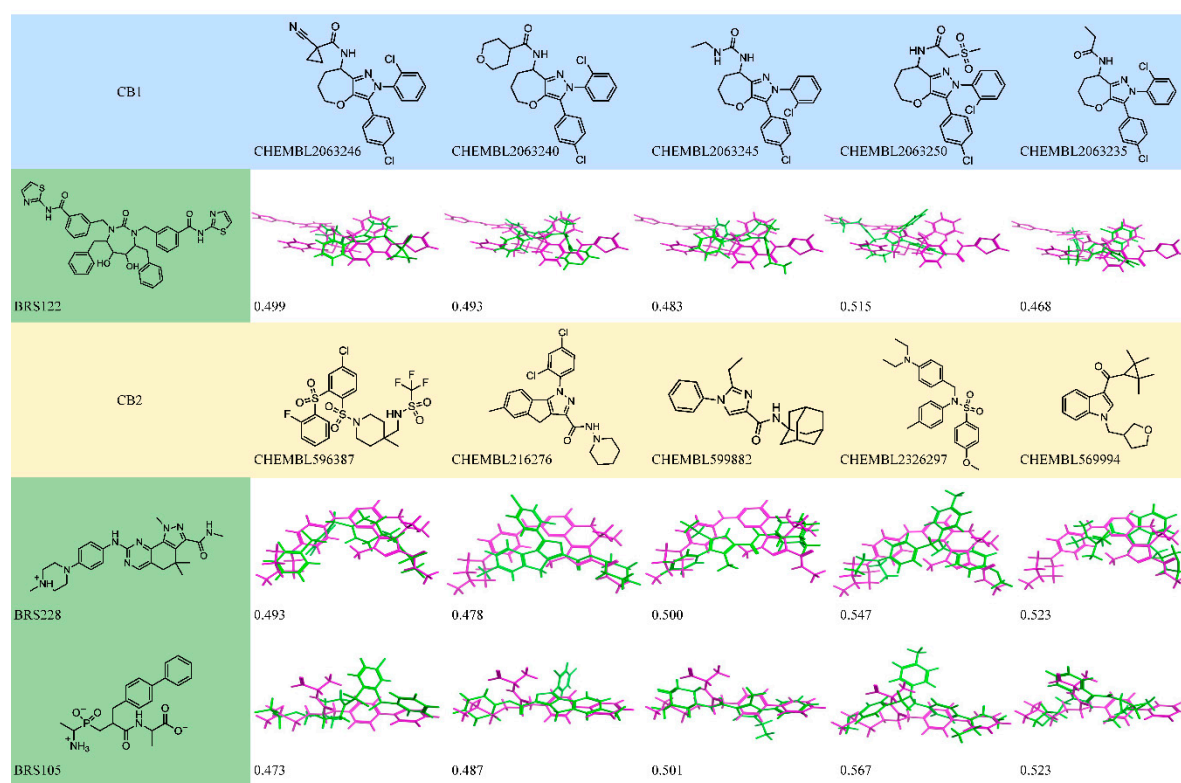

**Figure S5.** The superimpositions of the 5 most selective compounds of CB<sub>1</sub>/CB<sub>2</sub> and corresponding ligands of the most important features. The magenta structures are the ligands of the most important features, and the green structures are the selective compounds of CB<sub>1</sub>/CB<sub>2</sub>. The values at the left bottom of alignment structures are the superimposition scores. The 2D topological structures of the selective compounds and ligands were dissimilar to each other. However, the 3D shapes of them were similar and these relationships can be detected with BRS-3D analysis of large dataset.

## Reference

1. Gatica, E.A.; Cavasotto, C.N. Ligand and Decoy Sets for Docking to G Protein-Coupled Receptors. *J. Chem. Inf. Model.* **2012**, *52*, 1–6.
